# Supplementary figures and images for: Phase stability of Li–Mn–O oxides as cathode materials for Li-ion batteries: insights from ab initio calculations
Source: Royal Society of Chemistry journal article supplement (doi:10.1039/c4cp00937a), 2014-01-01

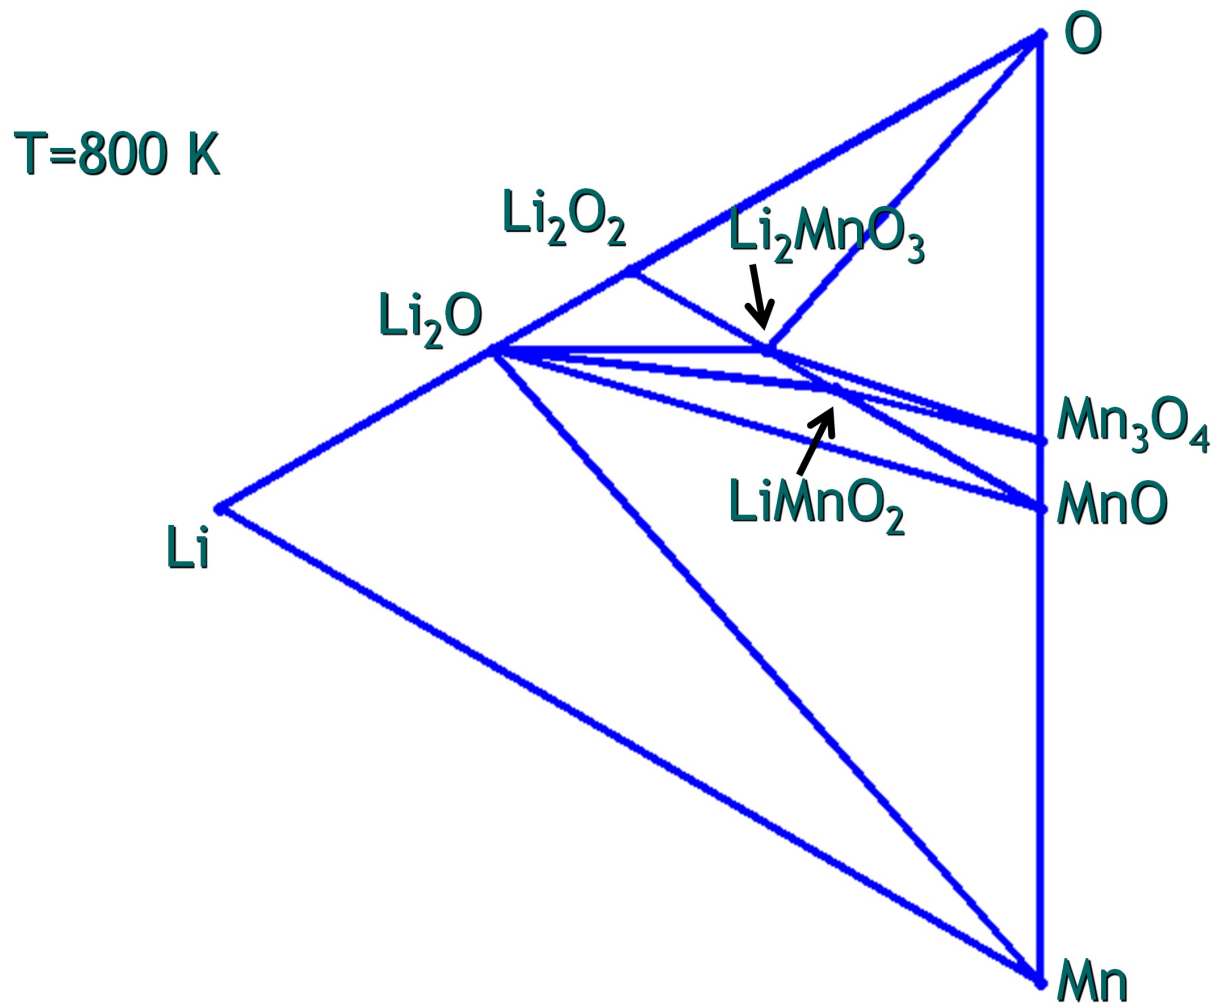

Supplement: c4cp00937a1.pdf [file c4cp00937a1.pdf]

T=1300 K

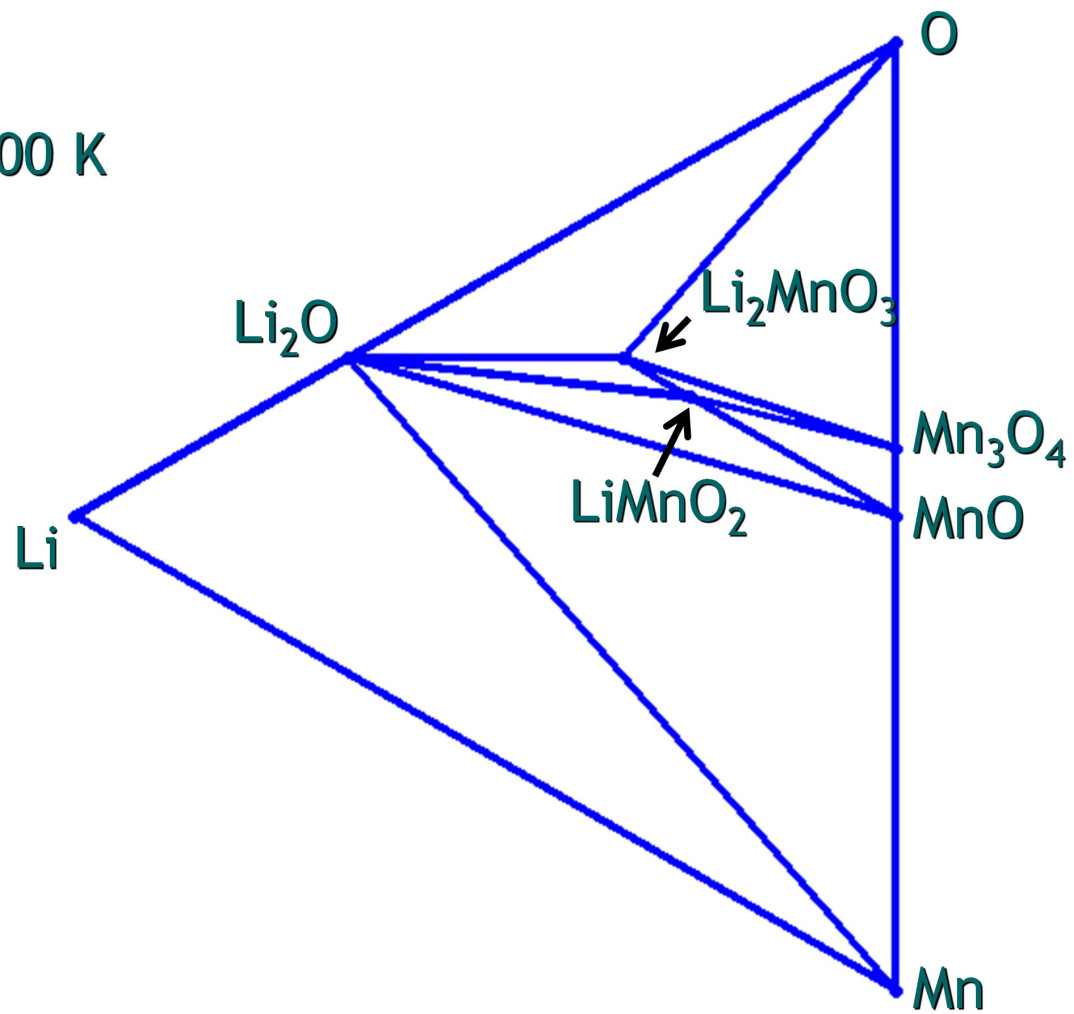

Supplement: c4cp00937a2.pdf [file c4cp00937a2.pdf]

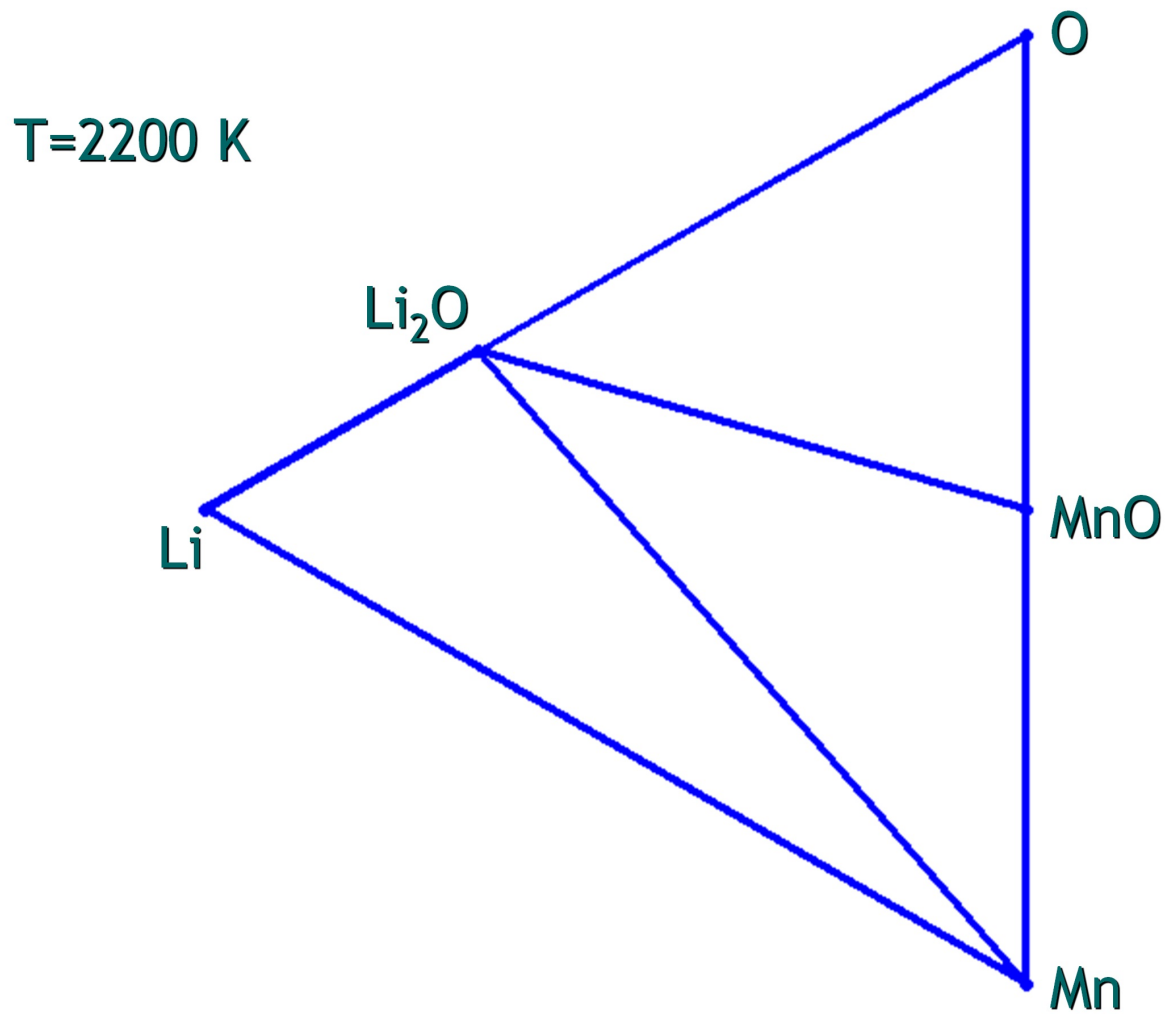

Supplement: c4cp00937a3.pdf [file c4cp00937a3.pdf]

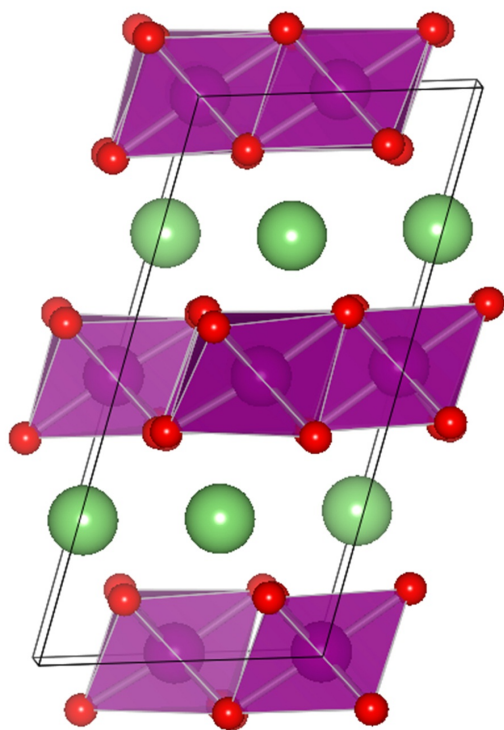

Layered  $\text{LiMnO}_2$

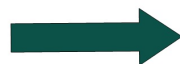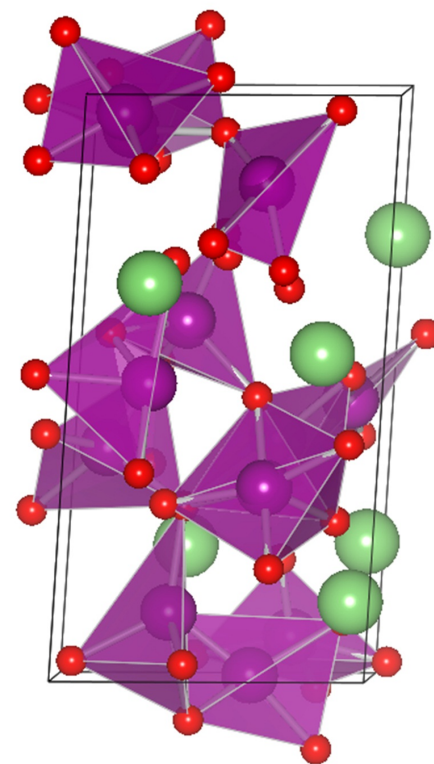

Transition state

Supplement: c4cp00937a4.pdf [file c4cp00937a4.pdf]
